# Supplementary material
Source: MDPI journal article supplement (https://www.mdpi.com/2075-163X/14/3/282)
Supplement: s1 [file s1]

**Table S1. Compilation of ages for the Cenozoic potassic rocks within and outside the ARSZ in western Yunnan.**

| Sampling site | Rock type                      | Analyzed objects | Analytical method | Age (Ma) | $\pm 2\sigma$ | Reference          |
|---------------|--------------------------------|------------------|-------------------|----------|---------------|--------------------|
| Yongping      | Syenite                        | Zircon           | LA-ICP-MS U-Pb    | 35.7     | 0.4           | Miao et al., 2021  |
| Yongping      | Syenite                        | Zircon           | LA-ICP-MS U-Pb    | 35.7     | 0.3           | Miao et al., 2021  |
| Yongping      | Nepheline syenite              | Zircon           | LA-ICP-MS U-Pb    | 35.1     | 0.2           | Miao et al., 2021  |
| Yongping      | Nepheline syenite              | Zircon           | LA-ICP-MS U-Pb    | 34.9     | 0.3           | Miao et al., 2021  |
| Yongping      | Syenite                        | Zircon           | LA-ICP-MS U-Pb    | 34.2     | 0.3           | Miao et al., 2021  |
| Weishan       | Quartz monzoporphyry           | Zircon           | SHRIMP U-Pb       | 35.4     | 0.6           | Lu et al., 2012    |
| Weishan       | Quartz monzoporphyry           | Zircon           | LA-ICP-MS U-Pb    | 34.8     | 0.3           | Liang et al., 2007 |
| Machangqing   | Biotite monzogranite           | Zircon           | LA-ICP-MS U-Pb    | 37.9     | 0.8           | He et al., 2011    |
| Machangqing   | Shoshonite (mafic rock)        | Phlogopite       | Ar-Ar             | 36.5     | 0.2           | Lu et al., 2015    |
| Machangqing   | Granite porphyry               | Zircon           | LA-ICP-MS U-Pb    | 36.2     | 0.3           | Xu et al., 2012    |
| Machangqing   | Granite porphyry               | Zircon           | LA-ICP-MS U-Pb    | 36.1     | 0.2           | Liu et al., 2020   |
| Machangqing   | Granite porphyry               | Zircon           | LA-ICP-MS U-Pb    | 35.9     | 0.3           | Yang et al., 2020  |
| Machangqing   | Amphibole syenite              | Zircon           | SHRIMP U-Pb       | 35.6     | 0.3           | Liang et al., 2004 |
| Machangqing   | Biotite amphibole monzogranite | Zircon           | SHRIMP U-Pb       | 35.6     | 0.3           | Lu et al., 2012    |
| Machangqing   | Monzogranite porphyry          | Zircon           | LA-ICP-MS U-Pb    | 35.3     | 0.4           | Zhou et al., 2019  |
| Machangqing   | Granodiorite porphyry          | Zircon           | LA-ICP-MS U-Pb    | 35.2     | 0.4           | Wang et al., 2020  |
| Machangqing   | Granite                        | Zircon           | LA-ICP-MS U-Pb    | 35.2     | 0.3           | Yang et al., 2020  |
| Machangqing   | Quartz diorite porphyry        | Zircon           | LA-ICP-MS U-Pb    | 35.1     | 0.3           | Wang et al., 2020  |
| Machangqing   | Granite porphyry               | Zircon           | SHRIMP U-Pb       | 35.0     | 0.2           | Liang et al., 2004 |
| Machangqing   | Amphibole monzogranite         | Zircon           | SHRIMP U-Pb       | 35.0     | 0.2           | Lu et al., 2012    |
| Machangqing   | Granite                        | Zircon           | LA-ICP-MS U-Pb    | 34.9     | 0.3           | Yang et al., 2020  |
| Machangqing   | Granite porphyry               | Zircon           | LA-ICP-MS U-Pb    | 34.9     | 0.4           | Wang et al., 2020  |
| Machangqing   | Granite aplite                 | Zircon           | SHRIMP U-Pb       | 34.4     | 0.2           | Lu et al., 2012    |
| Machangqing   | Quartz diorite porphyry        | Zircon           | LA-ICP-MS U-Pb    | 34.2     | 0.5           | Wang et al., 2020  |

|             |                                |            |                |      |     |                    |
|-------------|--------------------------------|------------|----------------|------|-----|--------------------|
| Machangqing | Granite porphyry               | Zircon     | LA-ICP-MS U-Pb | 34.1 | 0.3 | Yang et al., 2020  |
| Machangqing | Lamprophyre (mafic rock)       | Zircon     | LA-ICP-MS U-Pb | 34.1 | 0.2 | Shen et al., 2021  |
| Machangqing | Granite                        | Zircon     | LA-ICP-MS U-Pb | 33.8 | 0.2 | Guo et al., 2012   |
| Machangqing | Lamprophyre (mafic rock)       | Zircon     | LA-ICP-MS U-Pb | 33.8 | 0.1 | Jia et al., 2013   |
| Wase        | Shoshonite (mafic rock)        | Whole rock | Ar-Ar          | 35.1 | 0.2 | Huang et al., 2010 |
| Wase        | Olivinebasalt (mafic rock)     | Whole rock | Ar-Ar          | 35.1 | 0.2 | Huang et al., 2007 |
| Wozhong     | Shoshonite (mafic rock)        | Whole rock | Ar-Ar          | 35.5 | 0.1 | Huang et al., 2010 |
| Wozhong     | Olivinebasalt (mafic rock)     | Whole rock | Ar-Ar          | 35.5 | 0.1 | Huang et al., 2007 |
| Houshan     | Shoshonite (mafic rock)        | Whole rock | Ar-Ar          | 36.6 | 0.2 | Huang et al., 2010 |
| Houshan     | Trachybasalt (mafic rock)      | Whole rock | Ar-Ar          | 36.6 | 0.2 | Huang et al., 2007 |
| Houshan     | Latite (mafic rock)            | Whole rock | Ar-Ar          | 36.3 | 0.2 | Huang et al., 2010 |
| Houshan     | Shoshonite (mafic rock)        | Whole rock | Ar-Ar          | 36.0 | 0.4 | Huang et al., 2007 |
| Jianchuan   | Syenite porphyry               | Zircon     | LA-ICP-MS U-Pb | 35.8 | 0.3 | Tong et al., 2019  |
| Jianchuan   | Monzoporphyry                  | Zircon     | LA-ICP-MS U-Pb | 35.7 | 0.2 | Tong et al., 2019  |
| Jianchuan   | Monzoporphyry                  | Zircon     | SHRIMP U-Pb    | 35.7 | 0.2 | Lu et al., 2012    |
| Jianchuan   | Monzoporphyry                  | Zircon     | LA-ICP-MS U-Pb | 35.6 | 0.2 | Tong et al., 2019  |
| Jianchuan   | Amphibole syenite              | Zircon     | SHRIMP U-Pb    | 35.6 | 0.3 | Lu et al., 2012    |
| Jianchuan   | Syenite                        | Zircon     | LA-ICP-MS U-Pb | 35.6 | 0.2 | Liang et al., 2007 |
| Jianchuan   | Monzoporphyry                  | Zircon     | LA-ICP-MS U-Pb | 35.5 | 0.3 | Tong et al., 2019  |
| Jianchuan   | Monzoporphyry                  | Zircon     | LA-ICP-MS U-Pb | 35.4 | 0.2 | Tong et al., 2019  |
| Jianchuan   | Amphibole syenite              | Zircon     | SHRIMP U-Pb    | 35.4 | 0.3 | Lu et al., 2012    |
| Jianchuan   | Biotite monzoporphyry          | Zircon     | SHRIMP U-Pb    | 35.3 | 0.4 | Lu et al., 2012    |
| Jianchuan   | Monzoporphyry                  | Zircon     | LA-ICP-MS U-Pb | 35.3 | 0.2 | Tong et al., 2019  |
| Jianchuan   | Lamprophyre (mafic rock)       | Zircon     | LA-ICP-MS U-Pb | 34.9 | 0.1 | Li and Jiang, 2020 |
| Binchuan    | Amphibole quartz monzoporphyry | Zircon     | SHRIMP U-Pb    | 36.6 | 0.6 | Lu et al., 2012    |
| Binchuan    | Biotite quartz monzoporphyry   | Zircon     | SHRIMP U-Pb    | 35.4 | 0.4 | Lu et al., 2012    |

|       |                                   |            |                |      |     |                    |
|-------|-----------------------------------|------------|----------------|------|-----|--------------------|
| Beiya | Monzogranite                      | Zircon     | SHRIMP U-Pb    | 37.9 | 0.8 | Hou et al., 2017   |
| Beiya | Quartz monzoporphyry              | Zircon     | LA-ICP-MS U-Pb | 37.2 | 0.4 | Zhou et al., 2019  |
| Beiya | Granite porphyry                  | Zircon     | LA-ICP-MS U-Pb | 37.0 | 0.6 | Deng et al., 2015  |
| Beiya | Monzogranite porphyry             | Zircon     | SHRIMP U-Pb    | 36.9 | 0.3 | Lu et al., 2012    |
| Beiya | Altered monzogranite porphyry     | Zircon     | LA-ICP-MS U-Pb | 36.7 | 0.3 | He et al., 2016    |
| Beiya | Altered monzogranite porphyry     | Zircon     | LA-ICP-MS U-Pb | 36.7 | 0.2 | He et al., 2016    |
| Beiya | Monzogranite porphyry             | Zircon     | LA-ICP-MS U-Pb | 36.6 | 0.7 | Deng et al., 2015  |
| Beiya | Monzogranite porphyry             | Zircon     | LA-ICP-MS U-Pb | 36.6 | 0.4 | He et al., 2016    |
| Beiya | Granite porphyry                  | Zircon     | LA-ICP-MS U-Pb | 36.6 | 0.6 | Deng et al., 2015  |
| Beiya | Quartz syenite porphyry           | Zircon     | LA-ICP-MS U-Pb | 36.5 | 1.1 | Jiang et al., 2013 |
| Beiya | Quartz syenite porphyry           | Zircon     | LA-ICP-MS U-Pb | 36.5 | 0.3 | He et al., 2013    |
| Beiya | Monzogranite porphyry             | Zircon     | LA-ICP-MS U-Pb | 36.4 | 0.6 | He et al., 2016    |
| Beiya | Monzogranite porphyry             | Zircon     | LA-ICP-MS U-Pb | 36.3 | 0.1 | He et al., 2016    |
| Beiya | Monzogranite porphyry             | Zircon     | LA-ICP-MS U-Pb | 36.3 | 0.7 | Deng et al., 2015  |
| Beiya | Quartz syenite porphyry           | Zircon     | LA-ICP-MS U-Pb | 36.2 | 0.6 | He et al., 2012    |
| Beiya | Alkali feldspar syenite porphyry  | Zircon     | SHRIMP U-Pb    | 36.2 | 0.3 | Lu et al., 2012    |
| Beiya | Quartz syenite porphyry           | Zircon     | LA-ICP-MS U-Pb | 36.1 | 0.4 | Fu et al., 2015    |
| Beiya | Monzogranite porphyry             | Zircon     | LA-ICP-MS U-Pb | 36.0 | 0.5 | He et al., 2016    |
| Beiya | Monzogranite porphyry             | Zircon     | LA-ICP-MS U-Pb | 35.9 | 0.6 | Deng et al., 2015  |
| Beiya | Monzogranite porphyry             | Zircon     | LA-ICP-MS U-Pb | 35.7 | 0.6 | Deng et al., 2015  |
| Beiya | Potassic-altered granite porphyry | Zircon     | LA-ICP-MS U-Pb | 35.5 | 0.8 | Deng et al., 2015  |
| Beiya | Monzogranite porphyry             | Zircon     | LA-ICP-MS U-Pb | 35.4 | 0.6 | Deng et al., 2015  |
| Beiya | Potassic-altered granite porphyry | Zircon     | LA-ICP-MS U-Pb | 35.0 | 0.8 | Deng et al., 2015  |
| Beiya | Lamprophyre (mafic rock)          | Zircon     | LA-ICP-MS U-Pb | 35.0 | 0.7 | He et al., 2014    |
| Beiya | Quartz syenite porphyry           | Zircon     | LA-ICP-MS U-Pb | 34.9 | 0.7 | He et al., 2012    |
| Beiya | Minette (mafic rock)              | Phlogopite | Ar-Ar          | 34.9 | 0.1 | Guo et al., 2005   |

|           |                                  |            |                |       |     |                    |
|-----------|----------------------------------|------------|----------------|-------|-----|--------------------|
| Beiya     | Monzogranite porphyry            | Zircon     | LA-ICP-MS U-Pb | 34.7  | 0.9 | Deng et al., 2015  |
| Beiya     | Monzogranite porphyry            | Zircon     | LA-ICP-MS U-Pb | 34.7  | 0.8 | Deng et al., 2015  |
| Beiya     | Alkali feldspar granite porphyry | Zircon     | SHRIMP U-Pb    | 34.6  | 0.5 | Lu et al., 2012    |
| Beiya     | Latite (mafic rock)              | Phlogopite | Ar-Ar          | 34.4  | 0.2 | Lu et al., 2015    |
| Beiya     | Shoshonite (mafic rock)          | Phlogopite | Ar-Ar          | 33.9  | 0.2 | Lu et al., 2015    |
| Liuhe     | Syenite porphyry                 | Zircon     | LA-ICP-MS U-Pb | 36.9  | 0.4 | Tong et al., 2019  |
| Liuhe     | Syenite porphyry                 | Zircon     | LA-ICP-MS U-Pb | 36.0  | 0.7 | Tong et al., 2019  |
| Liuhe     | Syenite porphyry                 | Zircon     | LA-ICP-MS U-Pb | 34.6  | 1.1 | Tong et al., 2019  |
| Dalongtan | Syenite porphyry                 | Zircon     | LA-ICP-MS U-Pb | 34.1  | 0.1 | Li and Jiang, 2020 |
| Dalongtan | Syenite porphyry                 | Zircon     | LA-ICP-MS U-Pb | 33.2  | 0.3 | This study         |
| Yao'an    | Pseudoleucite porphyry           | Zircon     | LA-ICP-MS U-Pb | 34.1  | 0.3 | Sun et al., 2017   |
| Yao'an    | Syenite porphyry                 | Zircon     | SHRIMP U-Pb    | 33.8  | 0.4 | Luo et al., 2019   |
| Yao'an    | Lamprophyre (mafic rock)         | Phlogopite | Ar-Ar          | 33.7  | 0.5 | Lu et al., 2015    |
| Yao'an    | Biotite quartz monzoporphyry     | Zircon     | SHRIMP U-Pb    | 33.4  | 0.3 | Lu et al., 2012    |
| Yao'an    | Syenite porphyry                 | Zircon     | LA-ICP-MS U-Pb | 33.2  | 0.3 | Tang et al., 2022  |
| Yao'an    | Syenite porphyry                 | Zircon     | LA-ICP-MS U-Pb | 32.8  | 0.3 | Zhou et al., 2017  |
| Yao'an    | Quartz monzonite granite         | Zircon     | LA-ICP-MS U-Pb | 32.6  | 0.1 | Li and Jiang, 2020 |
| Yao'an    | Trachyte                         | Zircon     | LA-ICP-MS U-Pb | 32.4  | 0.2 | Huang et al., 2022 |
| Yao'an    | Quartz monzonite granite         | Zircon     | LA-ICP-MS U-Pb | 32.4  | 0.1 | Li and Jiang, 2020 |
| Yao'an    | Trachyte                         | Zircon     | LA-ICP-MS U-Pb | 32.3  | 0.3 | Huang et al., 2022 |
| Yao'an    | Lamprophyre (mafic rock)         | Zircon     | LA-ICP-MS U-Pb | 31.2  | 0.1 | Yan et al., 2019   |
| Zhiju     | Monzogranite                     | Zircon     | LA-ICP-MS U-Pb | 34.2  | 0.2 | Ding et al., 2016  |
| Zhiju     | Monzogranite                     | Zircon     | LA-ICP-MS U-Pb | 34.1  | 0.3 | Ding et al., 2016  |
| Zhiju     | Syenite porphyry                 | Zircon     | LA-ICP-MS U-Pb | 30.3  | 0.1 | Li and Jiang, 2020 |
| Zhiju     | Hornblende monzogranite          | Zircon     | LA-ICP-MS U-Pb | 29.31 | 0.3 | Li and Jiang, 2020 |
| Yongsheng | Granite porphyry                 | Zircon     | LA-ICP-MS U-Pb | 34.6  | 0.2 | Tang et al., 2022  |

|           |                                      |        |                |      |     |                   |
|-----------|--------------------------------------|--------|----------------|------|-----|-------------------|
| Yongsheng | Biotite granite porphyry             | Zircon | SHRIMP U-Pb    | 34.1 | 0.3 | Lu et al., 2012   |
| Yongsheng | Granite porphyry                     | Zircon | LA-ICP-MS U-Pb | 34.0 | 0.3 | Tang et al., 2022 |
| Yongsheng | Granite porphyry                     | Zircon | LA-ICP-MS U-Pb | 33.7 | 0.5 | Tang et al., 2022 |
| Yongsheng | Biotite quartz monzodiorite porphyry | Zircon | SHRIMP U-Pb    | 33.1 | 0.4 | Lu et al., 2012   |
| Ninglang  | Granite porphyry                     | Zircon | SHRIMP U-Pb    | 32.5 | 0.3 | Lu et al., 2012   |
| Ninglang  | Quartz monzonite                     | Zircon | LA-ICP-MS U-Pb | 35.6 | 0.2 | Ding et al., 2016 |
| Ninglang  | Quartz monzonite                     | Zircon | LA-ICP-MS U-Pb | 35.0 | 0.2 | Ding et al., 2016 |

---
